# Supplementary material
Source: PubMed Central journal article supplement (PMC4478800)
Supplement: supp_fj.14-267278_Supplemental_Figure1.pdf [file supp_fj.14-267278_Supplemental_Figure1.pdf]

**Figure S1**

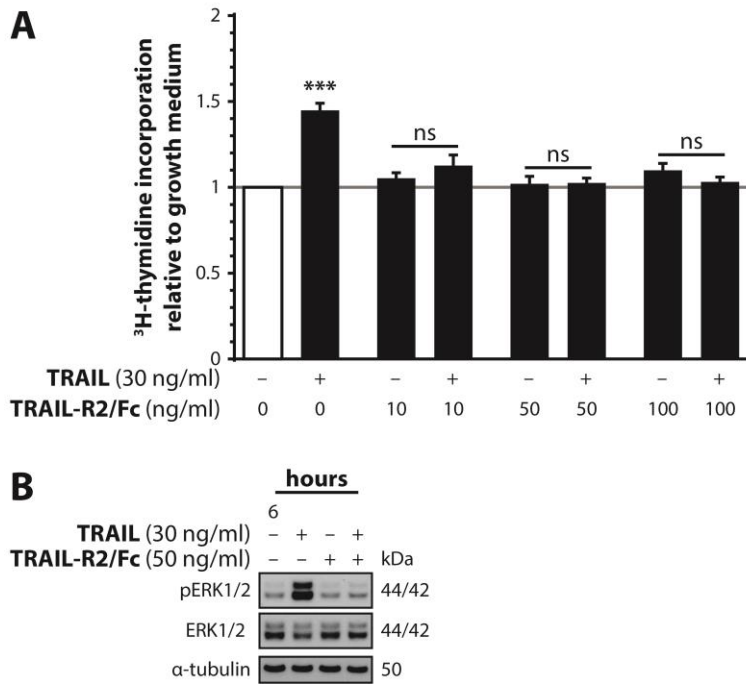

**Figure S1: TRAIL-mediated induction of proliferation and activation of ERK1/2 are dependent on its binding to TRAIL receptors.**

(A and B) SGBS preadipocytes were stimulated with growth medium alone or with TRAIL in the absence or presence of different doses of a recombinant human TRAIL-R2/Fc construct (R&D Systems, Wiesbaden-Nordenstadt, Germany). Of note, all stimulation media were incubated for 1 hour at 37°C before addition to the cells. (A) After 72 hours, <sup>3</sup>H-thymidine incorporation was measured. Data are expressed as mean + SEM of three independent experiments performed. ns, not significant; \*\*\*, p<0.001 compared to growth medium alone (directly above the bars) or comparing the indicated treatments (above the connecting line) using a one-way ANOVA. (B) At the indicated time points, proteins were isolated and subjected to Western blot analysis to assess the inhibition of ERK1/2 activation by addition of the TRAIL-R2/Fc construct. α-tubulin was used as a loading control. One representative of three independent experiments performed is shown.
