# Supplementary material
Source: PubMed Central journal article supplement (PMC4478800)
Supplement: supp_fj.14-267278_Supplemental_Figure2.pdf [file supp_fj.14-267278_Supplemental_Figure2.pdf]

**Figure S2**

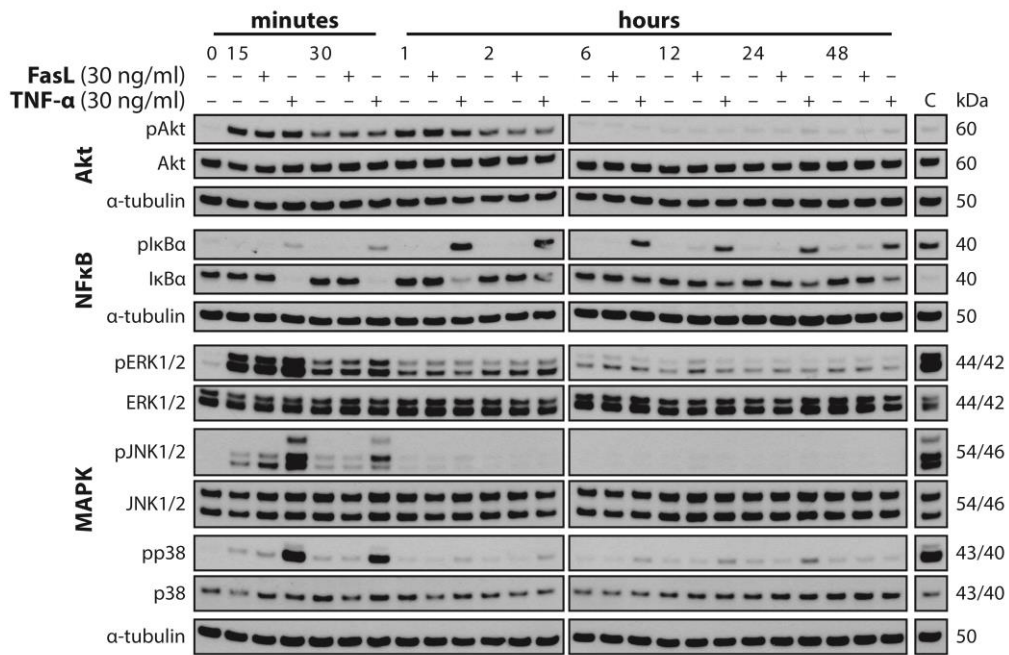

**Figure S2: FasL and TNF-α activate distinct signaling cascades.**

SGBS preadipocytes were stimulated with growth medium alone or with either FasL or TNF-α. At the indicated time points, proteins were isolated and subjected to Western blot analysis to assess the activation state of the Akt, NFκB, and MAPK (ERK1/2, p38, JNK) pathways. α-tubulin was used as a loading control. "C" indicates a positive control. One representative of two independent experiments performed is shown.
